# Supplementary material for: The role of tin oxide surface defects in determining nanonet FET response to humidity and photoexcitation
Source: Royal Society of Chemistry journal article supplement (doi:10.1039/c3tc31713g), 2013-11-15
Supplement: c3tc31713g.pdf [file c3tc31713g.pdf]

## The role of surface defects of tin oxide nanonet FET in response to humid air and photoexcitation effect

Sun Cheng<sup>a</sup>, K.R.G.Karthik<sup>a</sup>, Stevin Pramana<sup>a</sup>, Lydia H. Wong<sup>a</sup>, Jie Zhang<sup>b</sup>, Huang Yizhong<sup>a</sup>, Chong Haur Sow<sup>c</sup>, Nripan Mathews<sup>\*,a,d</sup>, and Subodh G. Mhaisalkar<sup>a,b,e</sup>

*a. School of Materials Science and Engineering, Nanyang Technological University (NTU), Block N4.1, Nanyang Avenue, 639798, Singapore. Email: nripan@ntu.edu.sg*

*b. Institute of Materials Research and Engineering (IMRE), 3 Research Link, 117602, Singapore*

*c. Department of Physics, 2 Science Drive 3, National University of Singapore (NUS), 117542, Singapore*

*d. Singapore-Berkeley Research Initiative for Sustainable Energy, 1 Create Way, 138602, Singapore*

*e. Energy Research Institute, Nanyang Technological University, Singapore 637553*

† Electronic Supplementary Information (ESI) available: Exxx. See DOI: 10.1039/b000000x/

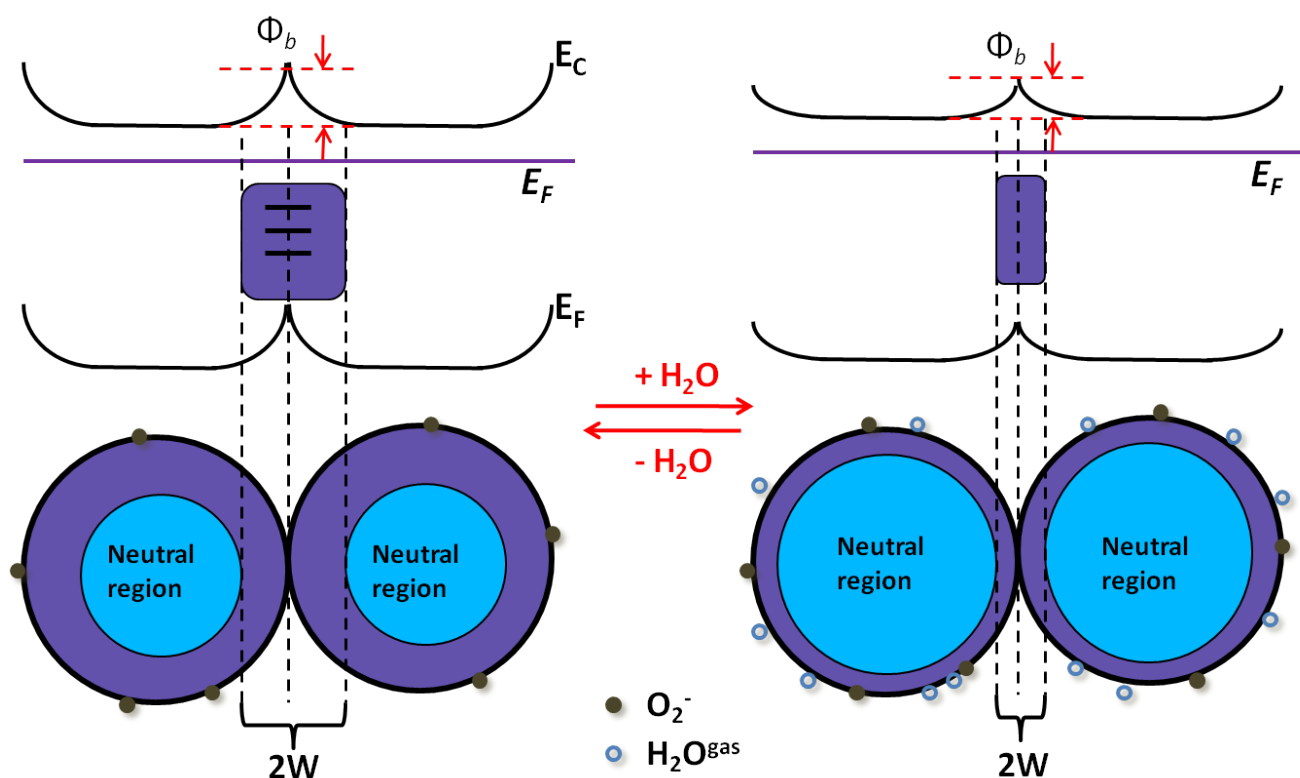

S1. The change of depletion layer and height of energy barriers upon water vapor adsorption and desorption.

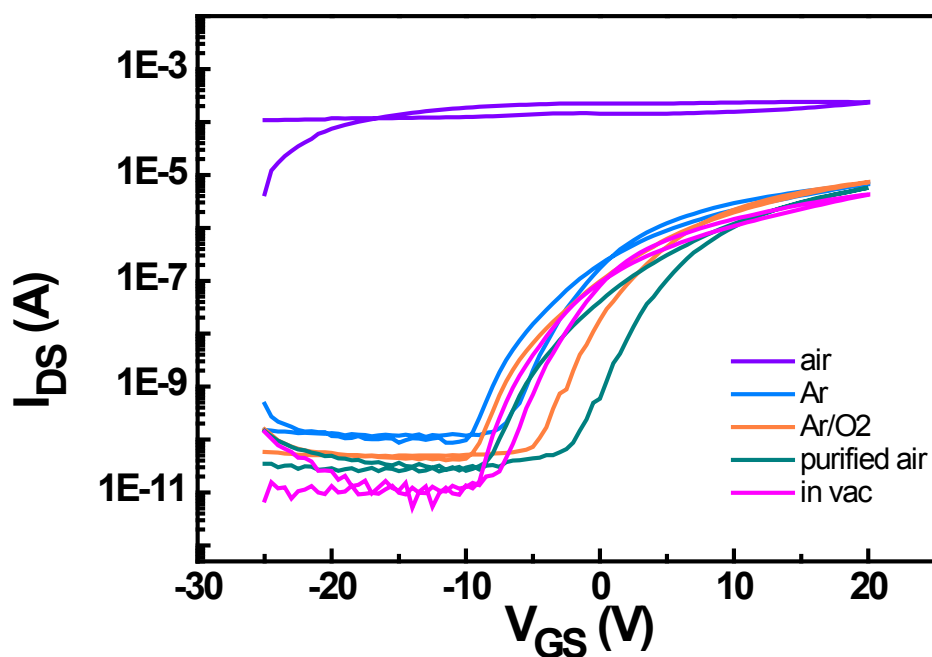

S2 Performance of nanonet-FET in 5 different testing environment namely humid air, pure Ar, Ar+5%O<sub>2</sub>, dry air and vacuum( $1 \times 10^{-2}$  Torr) for 0%O<sub>2</sub>/Ar when device L = 200  $\mu$ m.

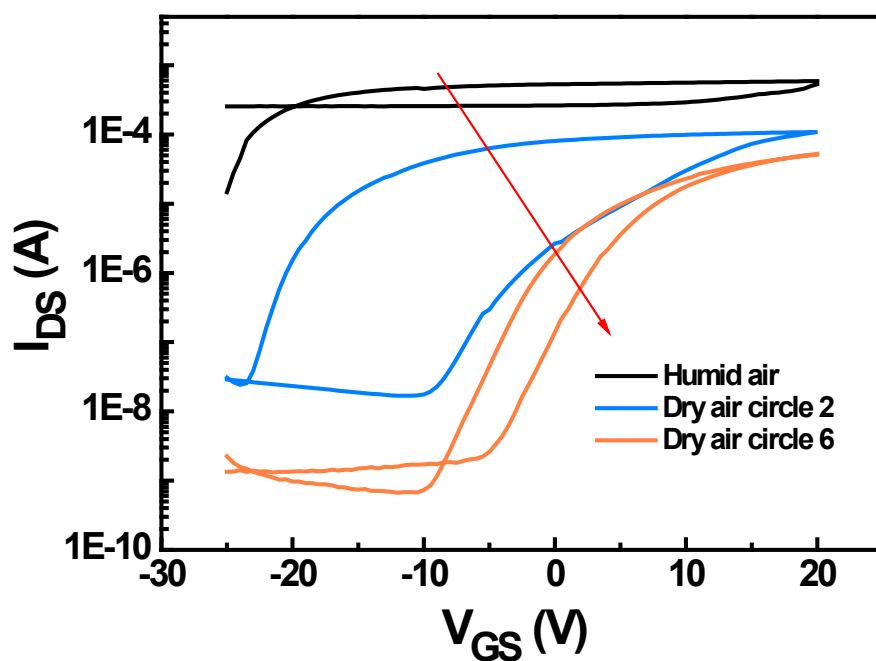

S3 Illustration of the electrical behavior of nanonet-FET when devices were subjected to dry air (0.5% O<sub>2</sub>/Ar nanowire) which shows a slower response compared to 0% O<sub>2</sub>/Ar nanowire ;
